# Supplementary material for: Gesture's body orientation modulates the N400 for visual sentences primed by gestures
Source: PubMed Central journal article supplement — Hum Brain Mapp. 2020 Aug 18;41(17):4901–11. doi: 10.1002/hbm.25166 (PMC7643362; doi:10.1002/hbm.25166), 2020-08-18
Supplement: HBM-41-4901-s001.pdf [file HBM-41-4901-s001.pdf]

## Supplement

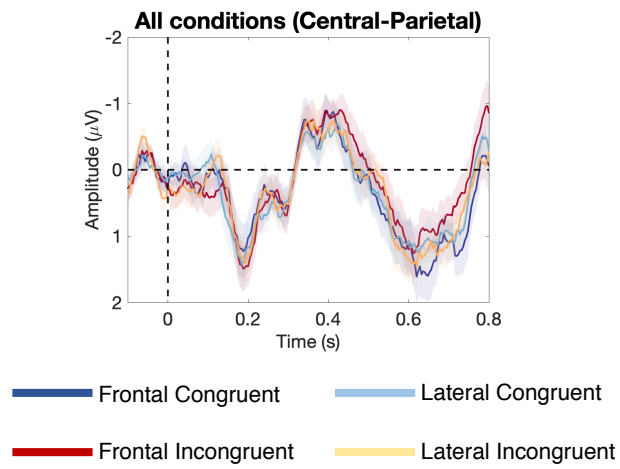

**Figure S1:** ERPs at the onset of the non-critical word, averaged from nine central-parietal electrodes (C1, Cz, C2, CP1, CP1, CPz, CP2, P1, Pz, P2), for all experimental conditions.
